# Supplementary material for: Postdiagnostic Fruit and Vegetable Consumption and Breast Cancer Survival: Prospective Analyses in the Nurses' Health Studies
Source: Oxford University Press journal article supplement (doi:10.1158/0008-5472.can-18-3515), 2020-11-13
Supplement: 00085472can183515-sup-211769_2_supp_6505880_qjjbk8.pdf [file 00085472can183515-sup-211769_2_supp_6505880_qjjbk8.pdf]

**Breast Cancer-Specific Mortality**

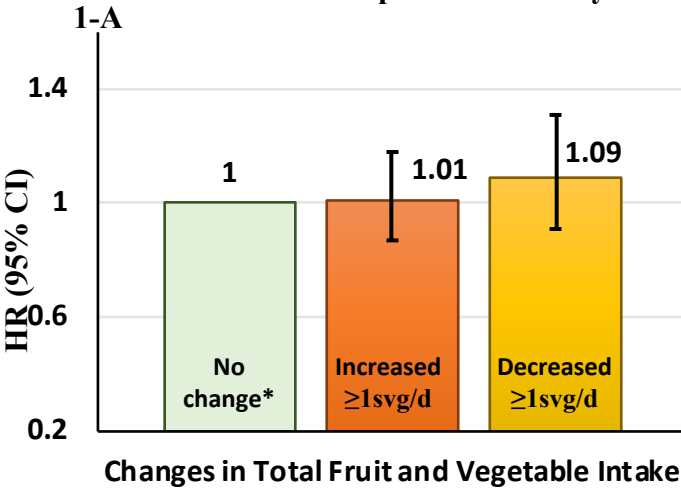

**All-cause Mortality**

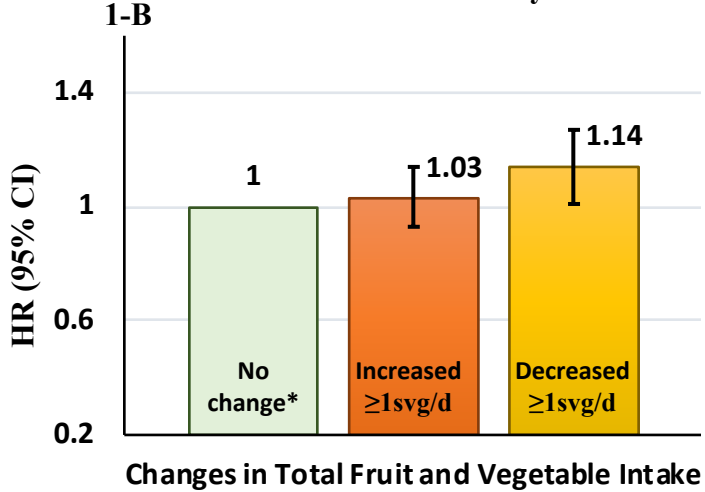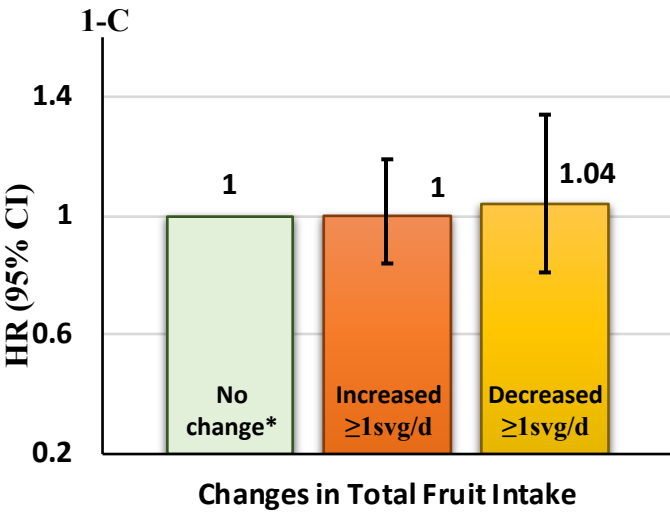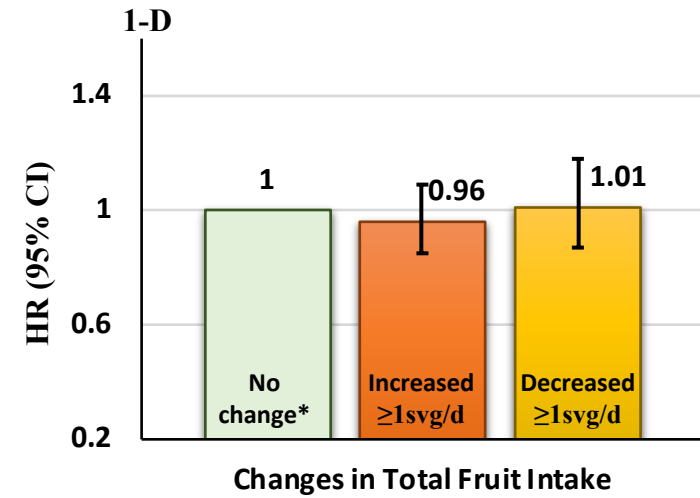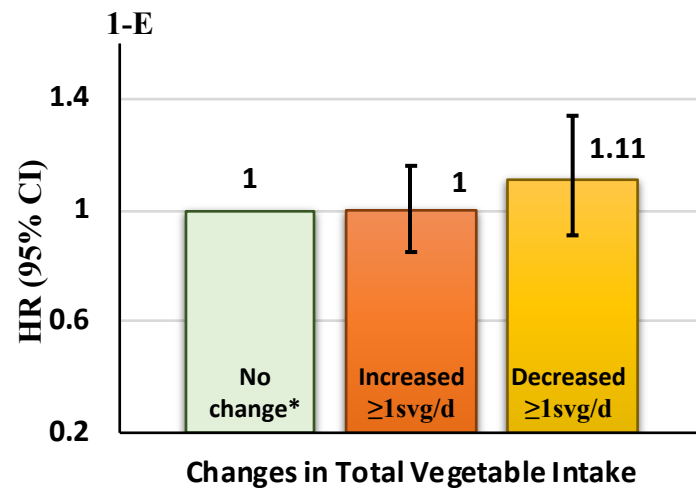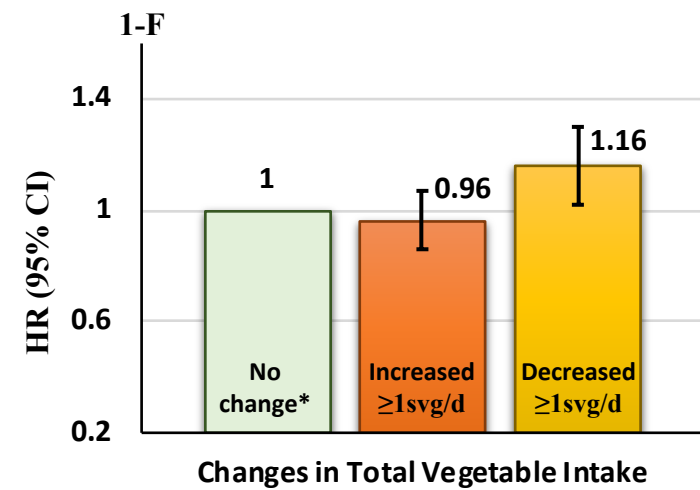

**Figure S1. Changes in intake of total fruits and vegetables (1-A and 1-B), total fruits (1-C and 1-D), and total vegetable (1-E and 1-F) from pre- to post-diagnosis in relation to mortality after breast cancer diagnosis.**

\* No change: less than 1 serving/day decrease or increase in intake from pre- to post-diagnosis

**Breast Cancer-Specific Mortality**

**All-Cause Mortality**

**1-A Total fruit and vegetable consumption**

**1-B Total fruit and vegetable consumption**

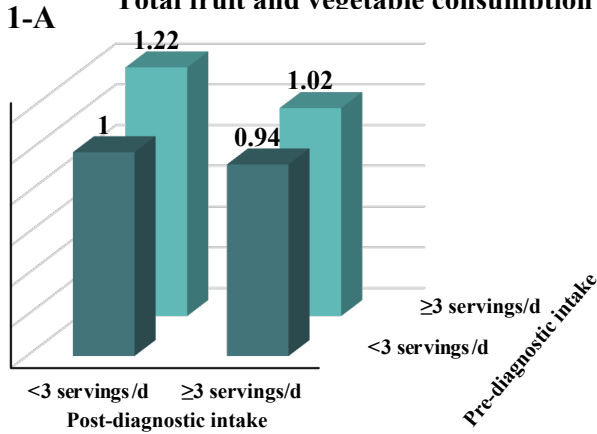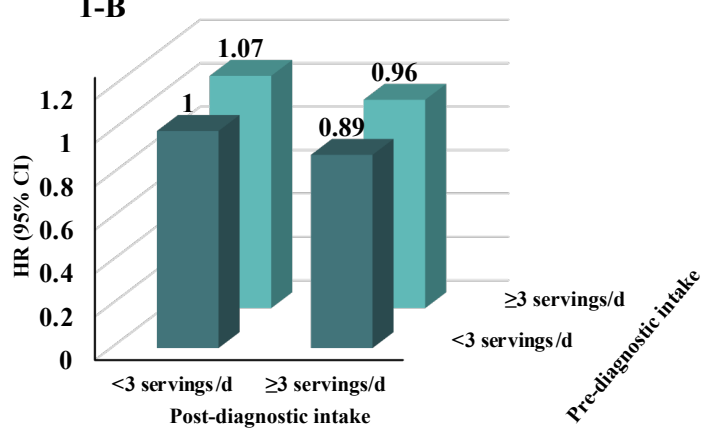

**1-C Total fruit consumption**

**1-D Total fruit consumption**

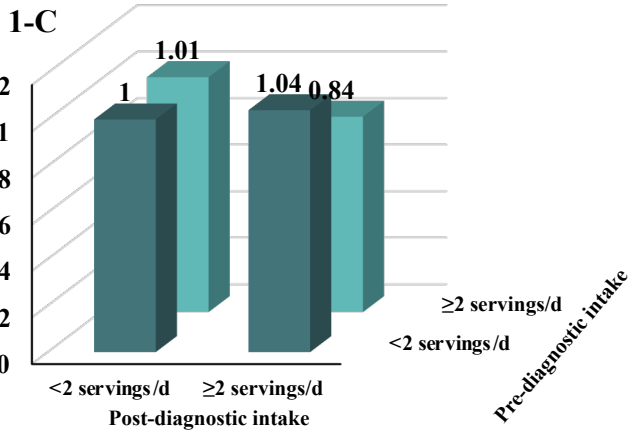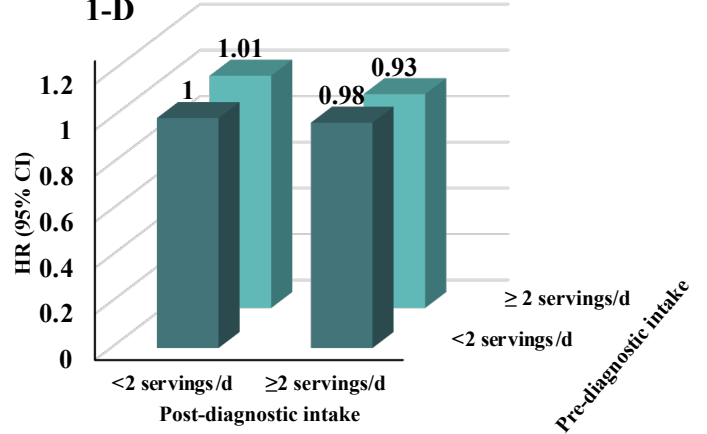

**1-E Total vegetable consumption**

**1-F Total vegetable consumption**

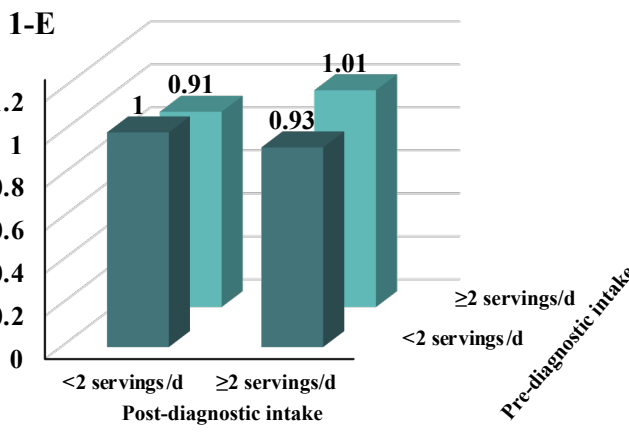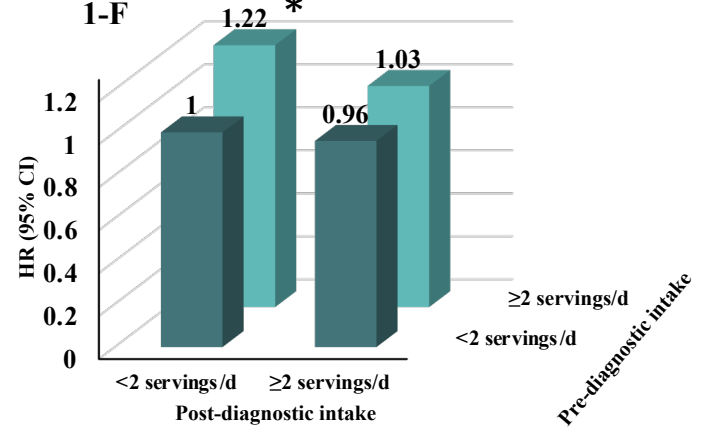

**Figure S2. Cross-classification of pre- and post-diagnostic intake (high/high, low/high, high/low, compared with low/low ) of total fruits and vegetables (1-A and 1-B), total fruits (1-C and 1-D), and total vegetable (1-E and 1-F) in relation to mortality after breast cancer diagnosis.**
